# Supplementary material
Source: publisher figshare collection journal article supplement (https://karger.figshare.com/articles/dataset/_/7667060)
Supplement: Supplementary file 1 [file 1]

**Supplementary Table 1. Proportions of the etiologic subgroups [Trial of ORG 10172 in Acute Stroke Treatment (TOAST) classification]**

| <b>TOAST classification</b>                                                     | <b>N</b>   |
|---------------------------------------------------------------------------------|------------|
| Small vessel occlusion                                                          | 35 (17.7%) |
| Large artery atherosclerosis                                                    | 34 (17.2%) |
| Cardioembolism                                                                  | 29 (14.6%) |
| <i>High-risk sources</i>                                                        |            |
| Atrial fibrillation                                                             | 6          |
| Atrial fibrillation with intracardiac (left atrial & left ventricular) thrombus | 2          |
| Atrial fibrillation with dilated cardiomyopathy                                 | 1          |
| Intracardiac thrombus                                                           | 3          |
| Dilated cardiomyopathy                                                          | 2          |
| Rheumatic mitral valve disease                                                  | 1          |
| Bioprosthetic and mechanical heart valves                                       | 2          |
| Symptomatic congestive heart failure with ejection fraction less than 30%       | 2          |
| Non-bacterial thrombotic endocarditis                                           | 1          |
| Infective endocarditis                                                          | 1          |
| <i>Medium-risk sources</i>                                                      |            |
| Patent foramen ovale (PFO)                                                      | 6          |
| PFO with Atrial septal aneurysm                                                 | 2          |
| Other determined                                                                | 40 (20.2%) |
| Dissection                                                                      | 17         |
| Moyamoya disease                                                                | 15         |
| Migrainous infarction                                                           | 1          |
| Reversible cerebral vasoconstriction syndrome                                   | 1          |
| Systemic lupus erythematosus (SLE)                                              | 1          |
| SLE with anti-phospholipid antibody syndrome                                    | 1          |
| Churg-Strauss syndrome                                                          | 1          |
| Sjogren's syndrome                                                              | 1          |
| Primary angiitis of the central nervous system                                  | 2          |
| Undetermined                                                                    | 60 (30.3%) |
