# Supplementary material
Source: publisher figshare collection journal article supplement (https://karger.figshare.com/articles/dataset/_/7667060)
Supplement: Supplementary file 2 [file 1]

**Supplementary Table 2. Three patients with an initial false-positive result on the vasculitis panel screening**

|           | Age | Gender | Vasculitis panel              | Initial                           | 3 month follow-up | Final etiologic diagnosis |
|-----------|-----|--------|-------------------------------|-----------------------------------|-------------------|---------------------------|
| Patient 4 | 37  | Female | Anti-cardiolipin IgM antibody | Weakly positive (20.738 MPL U/mL) | Negative          | Dissection                |
| Patient 5 | 36  | Female | Antinuclear antibody          | 1:40 (mixed pattern)              | Negative          | Dissection                |
| Patient 6 | 45  | Male   | Antinuclear antibody          | 1:40 (homogenous pattern)         | Negative          | SAO                       |

SAO, small artery occlusion.
